# Supplementary material
Source: ML conference proceedings conference paper supplement (https://proceedings.neurips.cc/paper_files/paper/2022/hash/c7793beb7f32b559df55d48370f2b8ae-Abstract.html)
Supplement: Supplementary file 1 [file c7793beb7f32b559df55d48370f2b8ae-Supplemental-Conference.pdf]

---

# Active Learning of Classifiers with Label and Seed Queries (Supplementary Material)

---

**Marco Bressan**

Dept. of CS, Univ. of Milan, Italy  
marco.bressan@unimi.it

**Nicolò Cesa-Bianchi**

DSRC & Dept. of CS, Univ. of Milan, Italy  
nicolo.cesa-bianchi@unimi.it

**Silvio Lattanzi**

Google  
silviol@google.com

**Andrea Paudice**

Dept. of CS, Univ. of Milan, Italy &  
Istituto Italiano di Tecnologia, Italy  
andrea.paudice@unimi.it

**Maximilian Thiessen**

Research Unit ML, TU Wien, Austria  
maximilian.thiessen@tuwien.ac.at

## A Supplementary material for Section 3

### A.1 Claim 1

**Claim 1.** *Let  $K \subset \mathbb{R}^m$  be a convex body, let  $E \supseteq K$  be any enclosing ellipsoid, and let  $\mu_E$  be the centroid of  $E$ . Let  $f(x) = Ax + \mu$  be an affine transformation with  $\|A\|_2 \leq \lambda$  and  $\mu \in K$ . Then for any  $x \in K$  we have  $f(x) \in \sigma(E, \mu_E, \lambda + 1)$ .*

*Proof.* Without loss of generality, we can assume  $K$  to be full rank. We can also assume  $E$  to be the  $\ell_2$  unit ball; otherwise, just apply an appropriate affine transformation at the beginning of the proof, and its inverse at the end. Under these assumptions, for all  $x \in K$  we have  $\|x\|_2 \leq 1$ , and since  $\|\mu\|_2 \leq 1$  as well, we obtain:

$$\|f(x)\|_2^2 = \|Ax\|_2^2 + \|\mu\|_2^2 + 2\langle Ax, \mu \rangle \leq \lambda^2 + 1 + 2\lambda = (\lambda + 1)^2 \quad (8)$$

which implies  $f(x) \in (\lambda + 1)E$ . □

### A.2 Proof of Lemma 8

First, we prove that  $E_i \leq m^2(m + 1) \text{conv}(C_i)$  for all  $i \in [k]$ . This is trivial if  $E_i = \emptyset$ , so assume  $E_i \neq \emptyset$  and let  $\ell_i \geq 1$  be the value of  $h_i$  at return time. For every  $h = 1, \dots, \ell_i$  let  $E_i^h = \text{MVE}(S_i^h)$  and let  $\mu_i^h$  be the center of  $E_i^h$ . If  $\mu_i$  is the center of  $E_i$  then by John's theorem  $\sigma(E_i, \mu_i, \frac{1}{m}) \subseteq \text{conv}(X_i)$ , and since  $X_i \subset \bigcup_{h=1}^{\ell_i} E_i^h$ , then  $\text{conv}(X_i) \subseteq \text{conv}\left(\bigcup_{h=1}^{\ell_i} E_i^h\right)$ . Moreover  $E_i^h \subseteq \sigma(\text{conv}(S_i^h), \mu_i^h, m)$  for all  $h \in [\ell_i]$ , which yields:

$$\sigma\left(E_i, \mu_i, \frac{1}{m}\right) \subseteq \text{conv} \bigcup_{h=1}^{\ell_i} \sigma(\text{conv}(S_i^h), \mu_i^h, m) \quad (9)$$

Thus we need only to show that the right-hand side is in  $\sigma(\text{conv}(C_i), \mu, m(m + 1))$  for some  $\mu \in \mathbb{R}$ .

Let  $S_i = \cup_{h=1}^{\ell_i} S_i^h$ , let  $E = \text{MVE}(S_i)$ , and let  $\mu$  be the center of  $E$ . (Note that in general  $E \neq E_i$ ). For every  $h \in [\ell_i]$ , by applying Claim 1 from Appendix A to  $f(x) = \sigma(x, \mu_i^h, m)$  and by John's theorem:

$$\sigma(\text{conv}(S_i^h), \mu_i^h, m) \subseteq \sigma(E, \mu, m+1) \subseteq \sigma(\text{conv}(S_i), \mu, m(m+1)) \quad (10)$$

By taking the union over all  $h \in [\ell_i]$ , and since  $\text{conv}(S_i) \subseteq \text{conv}(C_i)$ , we obtain:

$$\bigcup_{h=1}^{\ell_i} \sigma(\text{conv}(S_i^h), \mu_i^h, m) \subseteq \sigma(\text{conv}(C_i), \mu, m(m+1)) \quad (11)$$

As the right-hand side is a convex set, (11) still holds if the left-hand side is replaced by its own convex hull; but that convex hull is the right-hand side of (9), which proves the sought claim.

We conclude the proof. For the correctness, since  $E_i \leq m^2(m+1) \text{conv}(C_i)$ , and since the updates at lines 1 and 1 guarantee that  $(X_i)_{i \in [k]}$  is a partition of  $X$ , then  $((X_i, E_i))_{i \in [k]}$  is an  $m^2(m+1)$ -rounding of  $X$ . For the running time, the **for** loops perform  $k \leq n$  iterations, and the **while** loop performs at most  $n$  iterations as each iteration strictly decreases the size of  $X$ . The running time of any iteration is dominated by the computation of  $\text{MVE}(S_i)$  or  $\text{MVE}(X_i)$ , which takes time  $\text{poly}(n+m)$ , see above. Hence  $\text{Round}(X, k)$  runs in time  $\text{poly}(n+m)$ . For the query bounds, the **while** loop makes  $\mathcal{O}(m^2 k)$  LABEL queries per iteration. By standard generalization bounds, since the VC dimension of ellipsoids in  $\mathbb{R}^m$  is  $\mathcal{O}(m^2)$ ,  $E_i^h$  contains at least half of  $X \cap C_i$  with probability at least  $\frac{1}{2}$ , and thus the expected number of rounds before  $X$  becomes empty is in  $\mathcal{O}(k \lg n)$ , see Bressan et al. [2021a]. We conclude that  $\text{Round}(X, k)$  uses  $\mathcal{O}(m^2 k^2 \lg n)$  LABEL queries in expectation.

### A.3 Pseudocode of CPLearn and full proof of Theorem 10

We present CPLearn and prove Theorem 10. The pseudocode of CPLearn is given in Algorithm 4 below; to keep that pseudocode readable we have omitted some details, discussing them in the proof (e.g., the choice of some parameters). For the sake of the proof we suppose  $h^{-1}(*) = \emptyset$ . It is immediate to verify that the proof holds when  $h^{-1}(*) \neq \emptyset$ , too, since SEED never returns points in  $h^{-1}(*)$  and thus CPLearn behaves identically on  $X$  and on  $X \setminus h^{-1}(*)$ .

CPLearn starts by issuing  $\text{SEED}(X, +1)$  and  $\text{SEED}(X, -1)$  at lines 4–4, and if either one returns NIL then we immediately return  $(\emptyset, X)$  or  $(X, \emptyset)$  accordingly, which is clearly correct. Therefore we can continue assuming none of the two queries returned NIL.

**Reduction to the homogeneous case via lifting.** CPLearn works on a *lifted* version of the problem where the target separator is homogeneous. For any  $z \in \mathbb{R}^m$  and any  $c \in \mathbb{R}$  let  $(z, c) \in \mathbb{R}^{m+1}$  be the vector obtained by extending  $z$  with a coordinate equal to  $c$ . For each  $x \in X$  let  $x' = (x, R)$ , and let  $X' = \{x' : x \in X\}$  as in lines 4–4. Extend  $h$  to  $X'$  in the natural way by defining  $h(x') = h(x)$  for any  $x' \in X'$ . We claim that  $\{x' \in X' : h(x') = +1\}$  and  $\{x' \in X' : h(x') = -1\}$  are separated in  $\mathbb{R}^{m+1}$  by a homogeneous hyperplane with margin  $\frac{r}{2}$ . To see this, let  $u \in S^{m-1}$  and  $b \in \mathbb{R}$  such that  $h(x) \cdot (\langle x, u \rangle + b) \geq r$  for all  $x \in X$  with  $h(x) \neq *$ ; such  $u$  and  $b$  exist by the assumptions of the theorem, and note that  $b \leq R$ . Now let  $v = (u, b/R)$  and let  $u' = \frac{v}{\|v\|_2}$ ; note that  $\|v\|_2 \leq \|u\|_2 + \frac{b}{R} \leq 2$ . Then, for every  $x' \in X'$ :

$$\langle x', u' \rangle = \frac{\langle x', v \rangle}{\|v\|_2} = \frac{\langle x, u \rangle + R \cdot b/R}{\|v\|_2} = \frac{\langle x, u \rangle + b}{\|v\|_2} \quad (12)$$

which implies:

$$h(x') \cdot \langle x', u' \rangle = \frac{h(x) \cdot (\langle x, u \rangle + b)}{\|v\|_2} \geq \frac{r}{\|v\|_2} \geq \frac{r}{2} \quad (13)$$

Thus the problem of learning  $h$  reduces to learning the lifted version of  $h$  over  $X'$ , which is realized by a homogeneous separator with margin  $\frac{r}{2}$ . The rest of the proof shows that CPLearn from line 4 onward solves this lifted problem under the bounds of Theorem 10.

**Overview.** At a high level, CPLearn is a cutting-plane algorithm—see, e.g., Mitchell [2003]. Starting with  $V_0$  being the  $(m+1)$ -dimensional unit ball  $B(0, 1)$ , CPLearn computes a sequence of version

---

**Algorithm 4:** CPLearn( $X$ )

---

```
if SEED( $X, +1$ ) = NIL then return ( $\emptyset, X$ )
if SEED( $X, -1$ ) = NIL then return ( $X, \emptyset$ )
 $R \leftarrow \max_{x \in X} \|x\|_2$ 
 $X' \leftarrow \{(x, R) : x \in X\}$ 
 $i \leftarrow 0, V_0 \leftarrow B(0, 1)$  in  $\mathbb{R}^{m+1}$ 
for  $i \leftarrow 0, \dots, n$  do
    draw  $N = \Theta(m^6 n^{2a})$  points  $z_1, \dots, z_N$  independently  $\frac{1}{2m^3}$ -uniformly at random from  $V_i$ 
     $\hat{\mu}_i \leftarrow \frac{1}{N} \sum_{j=1}^N z_j$ 
     $X'_i \leftarrow \{x' \in X' : \langle \hat{\mu}_i, x' \rangle \geq 0\}$ 
     $X_i \leftarrow$  projection of  $X'_i$  on  $\mathbb{R}^m$ 
    if SEED( $X_i, -1$ ) = NIL and SEED( $X \setminus X_i, +1$ ) = NIL then
        return ( $X_i, X \setminus X_i$ )
    else
        exclude all points returned by the queries from future queries
        let  $u_i$  be any point returned by either query
        if  $i = 0$  then
             $u_i^* \leftarrow u_i$ 
        else
             $u_i^* \leftarrow u_i - z_0 \cdot \frac{\langle u_i, \hat{\mu}_i \rangle}{\langle z_0, \hat{\mu}_i \rangle}$  where  $z_0 = h(u_0) \cdot u_0$ 
         $V_{i+1} \leftarrow V_i \cap \{x' \in \mathbb{R}^{m+1} : h(u_i) \cdot \langle u_i^*, x' \rangle \geq 0\}$ 
    draw points independently near-uniformly at random from  $V_i$  until  $N = \text{poly}(m + n)$  of
    them,  $z_1, \dots, z_N$ , fall in  $V_{i+1}$ 
    use the covariance matrix of  $\{z_1, \dots, z_N\} \cap V_{i+1}$  to compute a coordinate system under
    which  $V_{i+1}$  is  $t$ -rounded
```

---

spaces  $V_1, V_2, \dots$  by setting  $V_{i+1} = V_i \cap Z_i^*$ , where  $Z_i^*$  is some halfspace determined through SEED queries, as follows. For every  $i \geq 0$  let  $\mu_i$  be the center of mass of  $V_i$ , and consider the halfspace:

$$H_i = \{x' \in \mathbb{R}^{m+1} : \langle \mu_i, x' \rangle \geq 0\} \quad (14)$$

Now let  $X'_i = X' \cap H_i$  and execute SEED( $X'_i, -1$ ) and SEED( $X' \setminus X'_i, +1$ ). If both return NIL then clearly  $(X_i, X \setminus X_i)$ , where  $X_i$  is the projection of  $X'_i$  on  $\mathbb{R}^m$ , is the partition of  $X$  induced by  $h$ . If instead either query returns a point  $u_i$ , then consider the halfspace:

$$Z_i = \{x' \in \mathbb{R}^{m+1} : h(u_i) \cdot \langle u_i, x' \rangle \geq 0\} \quad (15)$$

Finally, let  $V_{i+1} = V_i \cap Z_i$  and repeat. By standard arguments,  $\text{vol}(V_{i+1}) \leq (1 - 1/e) \text{vol}(V_i)$  but  $V_{i+1}$  contains a ball of radius  $\Omega(r/R)$ , and the process terminates within  $\mathcal{O}(m \log \frac{R}{r})$  iterations, see for instance [Gilad-Bachrach et al., 2004, Theorem 2].

There are two main obstacles in implementing this process. The first obstacle is computing  $\mu_i$ , which is hard in general [Rademacher, 2007]. Fortunately, we can efficiently compute a point  $\hat{\mu}_i$  that with good probability yields the same guarantees as  $\mu_i$ , by sampling from a near-uniform distribution over  $V_i$  via the hit-and-run random walk technique of Lovász and Vempala [2006]. The second obstacle is that, in order for hit-and-run to be efficient, we must have a system of coordinates under which  $V_i$  is well-rounded, i.e., not “too thin” along any direction. Unfortunately, letting  $V_{i+1} = V_i \cap Z_i$  may make  $V_{i+1}$  extremely thin, as we have no control over  $Z_i$  (it depends on the SEED answers). Therefore, CPLearn carefully rotates  $Z_i$  into a new halfspace  $Z_i^*$  such that  $V_{i+1} = V_i \cap Z_i^*$  contains  $V_i \cap Z_i$ , and that  $\text{vol}(V_i \cap Z_i^*)$  is not much smaller than  $\text{vol}(V_i)$ . This allows CPLearn to sample efficiently from  $V_{i+1}$ ; using those samples it then computes a coordinate system under which  $V_{i+1}$  is again well-rounded.

**A complete proof.** We say a convex body  $K \subset \mathbb{R}^{m+1}$  is  $t$ -rounded if  $B(0, t) \subseteq K \subseteq B(0, 1)$ . For every  $u \in \mathbb{R}^{m+1}$  let  $h_u = \{x \in X : \langle u, x' \rangle \geq 0\}$ . Fix  $t \in \Omega(1/m)$  and  $c > 0$  sufficiently small, and fix  $a > 0$  arbitrarily large. We show an implementation of CPLearn that satisfies the following invariants:

1.  $V_i$  contains all vectors  $u \in \mathbb{R}^{m+1}$  such that  $h_u = h$
2.  $\text{vol}(V_{i+1}) \leq (1 - c) \text{vol}(V_i)$
3.  $V_i$  is  $t$ -rounded under the coordinate system currently held by CPLearn

We prove that the first invariant holds deterministically for all  $i \geq 0$ , and that with probability at least  $1 - n^{1-a}$  the other ones hold for all  $i \geq 0$ . Together with the argument from Gilad-Bachrach et al. [2004] recalled above, the first two invariants imply that CPLearn returns a separator of  $X$  w.r.t.  $h$  in  $\mathcal{O}(m \log \frac{R}{r})$  iterations (and thus SEED queries). The third invariant ensures that CPLearn can sample enough points from the version space  $V_i$  in time  $\text{poly}(n + m)$ , which in turn ensures the overall running time is in  $\text{poly}(n + m)$ , where the degree depends on  $a$ .

Let us first discuss how at lines 4 and 4 one can sample from  $V_i$  and  $V_{i+1}$  in time  $\text{poly}(n + m)$  per sample, assuming both  $V_i$  and  $V_{i+1}$  are  $t$ -rounded in the coordinate system held by CPLearn. Let  $K$  be a  $t$ -rounded convex body in  $\mathbb{R}^{m+1}$ . For any given  $\epsilon > 0$ , the hit-and-run algorithm of Lovász and Vempala [2006] returns a point  $\epsilon$ -uniformly at random from  $K$  after  $\mathcal{O}(m^3 t^2 \ln t/\epsilon)$  steps; see Corollary 1.2 of Lovász and Vempala [2006]. Moreover, every step of that algorithm can be implemented in time polynomial in the representation of  $K$ , see for instance Bressan et al. [2021a]. By letting  $K = V_i$ , and noting that the representation of  $V_i$  has size  $\mathcal{O}(m + n)$  as  $i \leq n$  and every constraining halfspace can be encoded in  $\mathcal{O}(m)$  bits, we can sample a point  $\epsilon$ -uniformly in time  $\text{poly}(n, m, \ln t/\epsilon)$  per sample; the same holds for  $V_{i+1}$ . Since we set  $t = \Omega(1/m)$  and  $\epsilon = \Omega(1/\text{poly}(n + m))$ , we conclude that lines 4 and 4 take  $\text{poly}(n + m)$  time per sample.

Let us now turn to the invariants. Consider first the case  $i = 0$ . The first and third invariant hold trivially, while the second one holds for any  $c \leq 1/2$  since  $V_1$  is the intersection of  $V_0 = B(0, 1)$  and a homogeneous halfspace. Let then  $i \geq 1$  and suppose all invariants hold for  $i - 1$ . We prove that they hold for  $i + 1$  as well.

Let  $\eta = 1/2m^2$ , let  $\epsilon = \frac{\eta}{m}$ , and  $p = n^{-a}/2$ . Then, line 4 draws  $N = \Theta(m^2/\eta^2 p^2)$  independent  $\epsilon$ -uniform random points  $z_1, \dots, z_N$  from  $V_i$ , and line 4 sets  $\hat{\mu}_i$  as their average. As shown in Bressan et al. [2021a], this implies  $\Pr(d(\hat{\mu}_i, \mu_i) \leq \eta \phi(V_i)) \geq 1 - p$ , where  $\phi(V_i)$  is the Euclidean diameter of  $V_i$ . As  $V_i$  is  $t$ -rounded,  $\phi(V_i) \leq 2$ , hence  $\Pr(d(\hat{\mu}_i, \mu_i) \leq 1/m^2) \geq 1 - n^{-a}/2$ . Now suppose indeed  $d(\hat{\mu}_i, \mu_i) \leq 1/m^2$ . It is not hard to see that any halfspace  $Z$  containing  $\hat{\mu}_i$  satisfies  $\text{vol}(Z \cap V_i) \geq \frac{1}{e}(1 - \frac{1}{m})^{m+1} \text{vol}(V_i) = \Omega(\text{vol}(V_i))$ ; that is,  $\hat{\mu}_i$  has Tukey depth at least  $c$  (see the second invariant).

Next, consider the set  $X'_i$  computed at line 4, and observe that  $X'_i = X \cap H_i$ , where:

$$H_i = \{x' \in \mathbb{R}^{m+1} : \langle \hat{\mu}_i, x' \rangle \geq 0\} \quad (16)$$

Clearly, if the two queries at line 4 return NIL, then CPLearn returns the correct partition of  $X$ . Otherwise consider the point  $u_i$  returned by either query, see line 4, and let  $Z_i$  as in (15). By standard arguments  $\hat{\mu}_i \in Z_i$ , and therefore  $\text{vol}(V_i \cap Z_i) \leq (1 - c) \text{vol}(V_i)$  as said above. Moreover, again by standard arguments,  $V_i \cap Z_i$  contains all vectors  $u \in \mathbb{R}^{m+1}$  such that  $h_u = h$ .

Now let us turn to CPLearn. Since  $i \geq 1$ , CPLearn at line 4 defines:

$$u_i^* = u_i - z_0 \cdot \frac{\langle u_i, \hat{\mu}_i \rangle}{\langle z_0, \hat{\mu}_i \rangle} \quad (17)$$

Before continuing, we check that  $u_i^*$  is well-defined, i.e., that  $\langle z_0, \hat{\mu}_i \rangle > 0$ . Indeed,  $\hat{\mu}_i$  lies in the interior of  $V_i$  since it has positive Tukey depth (see above), and since by construction  $V_i \subseteq Z_0$  for all  $i \geq 1$ , then  $\hat{\mu}_i$  lies in the interior of  $Z_0$  too. Moreover  $z_0$  lies in the interior of  $Z_0$ , too, being the normal vector of  $Z_0$ . Hence  $\langle z_0, \hat{\mu}_i \rangle > 0$ , as claimed. Note also that, for every  $x \in \mathbb{R}^{m+1}$ , the definition of  $u_i^*$  and the linearity of the inner product yield:

$$\langle u_i^*, x \rangle = \langle u_i, x \rangle - \langle z_0, x \rangle \cdot \frac{\langle u_i, \hat{\mu}_i \rangle}{\langle z_0, \hat{\mu}_i \rangle} \quad (18)$$

Now, CPLearn at line 4 sets  $V_{i+1} = V_i \cap Z_i^*$ , where:

$$Z_i^* = \{x \in \mathbb{R}^{m+1} : h(u_i) \cdot \langle u_i^*, x \rangle \geq 0\} \quad (19)$$

We are now ready to prove the three invariants above.

*The first invariant.* We claim that  $V_i \cap Z_i \subseteq V_i \cap Z_i^*$ . In fact, we claim  $Z_0 \cap Z_i \subseteq Z_0 \cap Z_i^*$ ; this implies  $V_i \cap Z_i \subseteq V_i \cap Z_i^*$ , since by construction  $V_i \subseteq Z_0$  as  $i \geq 1$ . In turn, since  $V_i \cap Z_i$  contains

all vectors  $u \in \mathbb{R}^{m+1}$  such that  $h_u = h$ , see above, this implies that  $V_{i+1}$  contains all those vectors as well, proving the first invariant. Let  $x \in Z_0 \cap Z_i$ . Then:

$$h(u_i) \cdot \langle u_i^*, x \rangle = h(u_i) \cdot \langle u_i, x \rangle - h(u_i) \cdot \langle z_0, x \rangle \cdot \frac{\langle u_i, \hat{\mu}_i \rangle}{\langle z_0, \hat{\mu}_i \rangle} \quad (20)$$

Let us examine the terms of (20). First,  $h(u_i) \cdot \langle u_i, x \rangle \geq 0$  since  $x \in Z_i$ . Second,  $\langle z_0, x \rangle \geq 0$  since  $x \in Z_0$ . Third,  $\langle z_0, \hat{\mu}_i \rangle > 0$  as noted above. Thus the term  $-h(u_i) \cdot \langle z_0, x \rangle \cdot \frac{\langle u_i, \hat{\mu}_i \rangle}{\langle z_0, \hat{\mu}_i \rangle}$  has the same sign as  $-h(u_i) \cdot \langle u_i, \hat{\mu}_i \rangle$ . However, by definition  $u_i$  is a counterexample to the labeling given by  $H_i$ , which means  $h(u_i) \cdot \langle u_i, \hat{\mu}_i \rangle < 0$ . Therefore  $h(u_i) \cdot \langle u_i^*, x \rangle \geq 0$ , which implies  $x \in Z_i^*$  as desired.

*The second invariant.* We claim that  $\hat{\mu}_i \in Z_i^*$ . To this end just substitute  $x = \hat{\mu}_i$  in (18) to see that  $\langle u_i^*, \hat{\mu}_i \rangle = 0$ . since  $\mu_i$  has Tukey depth  $c > 0$  w.r.t.  $V_i$ , we deduce that  $\text{vol}(V_{i+1}) = \text{vol}(V_i \cap Z_i^*) \leq (1 - c) \text{vol}(V_i)$ . This proves the second invariant.

*The third invariant.* First of all, we claim that  $\text{vol}(V_{i+1}) = \text{vol}(V_i \cap Z_i^*) \geq c \text{vol}(V_i)$ . To this end just observe that  $\hat{\mu}_i$  is on the boundary of  $\mathbb{R}^{m+1} \setminus Z_i^*$ , too. Consider then line 4 of CPLearn: if the samples are independent  $\epsilon$ -uniform over  $V_i$ , then every sample drawn ends in  $V_{i+1}$  independently with probability at least  $c - \epsilon$ . Hence, as long as  $\epsilon < c/2$ , a sample of  $\Theta(N)$  such points from  $V_i$  will contain a subsample of  $N$  points  $z_1, \dots, z_N$  in  $V_{i+1}$  with probability  $1 - e^{-\Theta(N)}$ . Moreover, those  $N$  samples will be  $\frac{\epsilon}{c}$ -uniform in  $V_{i+1}$ . Therefore line 4 takes time  $\text{poly}(n + m)$  with probability  $1 - e^{-\text{poly}(n+m)}$ . For  $N$  large enough, the inverse of the covariance matrix of  $z_1, \dots, z_N$  CPLearn yields a coordinate system under which  $V_{i+1}$  is  $t$ -rounded with probability at least  $1 - n^{-a}/2$ , see for instance Vempala [2010]. This proves the third invariant.

**Wrap-up.** Note that CPLearn makes at most  $n$  iterations, as every iteration either returns (if the SEED queries return NIL) or decreases the number of points of  $X$  for which the label is not known (see line 4). Hence, with probability at least  $1 - n^{1-a}$ , all the invariants above hold for all  $i = 0, \dots, n-1$ . The query bounds and the running time bounds follow as explained above.

#### A.4 One-sided margin

We sketch the proof of Theorem 3. Let  $d$  be a metric over  $\mathbb{R}^m$  induced by some norm  $\|\cdot\|_d$ . We say  $C \subseteq X$  has one-sided strong convex hull margin  $\gamma$  with respect to  $d$  if  $d(\text{conv}(X \setminus C), \text{conv}(C)) \geq \gamma \phi_d(C)$ .

The idea behind Theorem 3 is to compute a Euclidean *one-sided*  $\alpha$ -rounding of  $X$  w.r.t.  $h$ , that is, a set  $\hat{X} \subseteq X$  such that  $C \subseteq \hat{X}$  and  $\hat{X} \leq \alpha \text{conv}(C)$ , where  $C = h^{-1}(+1)$ . We will compute  $\hat{X}$  for  $\alpha = \text{poly}(\frac{\kappa_d}{\gamma})$ , and then use the cutting-planes algorithm of Section 3.2. As the margin is invariant under scaling, assume without loss of generality  $\inf_{u \in S^{m-1}} \|u\|_d = 1$  and  $\sup_{v \in S^{m-1}} \|v\|_d = \kappa_d$ . Let  $x = \text{SEED}(X, +1)$ . If  $x = \text{NIL}$  then clearly  $h = -1$ . Otherwise we run  $\text{BallSearch}(X, x)$ , listed below.  $\text{BallSearch}$  sorts  $X$  by distance from  $x$ , and then uses LABEL queries to perform a binary search and find a pair of points  $x_{\text{lo}} \in C$  and  $x_{\text{hi}} \in X \setminus C$  adjacent in the ordering. (This works even if the order is not monotone w.r.t. the labels). At this point  $\text{BallSearch}$  guesses a value  $t$  for  $\frac{\gamma}{\kappa_d}$ , starting with  $t = 1$ . Given  $t$ , with a SEED query  $\text{BallSearch}$  checks if there are points of  $C$  among the points at distance between  $d_{\text{euc}}(x, x_{\text{hi}})$  and  $\frac{1}{t} d_{\text{euc}}(x, x_{\text{hi}})$  from  $x_{\text{hi}}$ . If not, then it lets  $\hat{X} = X \cap B(x, d_{\text{euc}}(x, x_{\text{lo}}))$ , else it lets  $\hat{X} = X \cap B(x, \frac{1}{t} d_{\text{euc}}(x, x_{\text{hi}}))$ . Finally, it checks whether  $C \subseteq \hat{X}$ ; if yes then it returns  $\hat{X}$ , else it halves  $t$  and repeat. One can show that this procedure stops with  $t \geq \frac{\gamma}{2\kappa_d}$ , yielding a  $\hat{X}$  such that  $\phi(\hat{X}) = \mathcal{O}(\phi(C)/t)$  and that  $C$  and  $\hat{X} \setminus C$  are linearly separated with margin  $\Omega(t \frac{\gamma}{\kappa_d} \phi(\hat{X}))$ . Setting  $R = \phi(\hat{X})$  and  $r = d_{\text{euc}}(C, \hat{X} \setminus C)$ , we conclude that  $\frac{R}{r} = \text{poly}(\frac{\kappa_d}{\gamma})$ . At this point by Theorem 10 we can compute  $C$  by running  $\text{CPLearn}(\hat{X})$ , which takes time  $\text{poly}(n + m)$  and uses  $\mathcal{O}(m \log \frac{\kappa_d}{\gamma})$  SEED queries in expectation.

**A remark on Theorem 3.** Given two pseudometrics  $d$  and  $q$  induced by seminorms  $\|\cdot\|_d$  and  $\|\cdot\|_q$ , let  $\kappa_d(q) = \sup_{u \in S_q^{m-1}} \|u\|_d / \inf_{v \in S_q^{m-1}} \|v\|_d$ . If one can compute  $\|\cdot\|_q$  efficiently, then Theorem 3 holds with  $\kappa_d(q)$  in place of  $\kappa_d$ . In fact, Theorem 3 is just the special case where  $q = d_{\text{euc}}$ . Therefore one can restate Theorem 3 so that  $d$  is an arbitrary pseudometric (thus including the case  $\kappa_d = \infty$ ), provided one has access to an approximation  $q$  of  $d$  with finite distortion.

---

**Algorithm 5:** BallSearch( $X, x_1$ )

---

let  $x_1, \dots, x_n$  be the points of  $X$  in order of Euclidean distance from  $x_1$  (break ties arbitrarily)

**if** LABEL( $x_n$ ) = +1 **then return**  $X$

lo  $\leftarrow$  1, hi  $\leftarrow$   $n$

**while** hi - lo  $\geq$  2 **do**

$i \leftarrow \lceil \frac{\text{hi} + \text{lo}}{2} \rceil$   
    **if** LABEL( $x_i$ ) = 1 **then** lo  $\leftarrow$   $i$  **else** hi  $\leftarrow$   $i$

$t \leftarrow$  1,  $r \leftarrow d_{\text{euc}}(x_1, x_{\text{lo}})$ ,  $R \leftarrow d_{\text{euc}}(x_1, x_{\text{hi}})$

**repeat**

$U_i \leftarrow \{x \in X : R \leq d_{\text{euc}}(x, x_1) \leq \frac{1}{t}R\}$   
    **if** SEED( $U_i, +1$ ) = NIL **then**  $\hat{X} \leftarrow X \cap B(x_1, r)$  **else**  $\hat{X} \leftarrow X \cap B(x_1, \frac{1}{t}R)$   
     $t \leftarrow t/2$

**until** SEED( $X \setminus \hat{X}, +1$ ) = NIL

**return**  $\hat{X}$ ;

---

## B Supplementary material for Section 4

### B.1 Full proof of Theorem 4

**Construction.** We first discuss the case  $k = 2$ . Let  $e_1, \dots, e_m$  be the canonical basis of  $\mathbb{R}^m$ . To ease the notation define  $p = m - 1$ ; the input set will span a  $p$ -dimensional subspace. Define:

$$\ell = \left\lfloor \frac{1}{\sqrt{2\gamma\sqrt{m}}} \right\rfloor \quad (21)$$

Since  $\gamma \leq \frac{m^{-3/2}}{16}$  and  $m \geq 2$ ,

$$\ell \geq \frac{1}{\sqrt{2\frac{m^{-3/2}}{16}\sqrt{m}}} = \sqrt{8m} \geq 4 \quad (22)$$

For each  $i \in [p]$  and  $j \in [\ell]$ , let  $x_i^j = e_i + j \cdot e_m$ . Finally, let  $X = \{x_i^j : i \in [p], j \in [\ell]\}$ . Define the concept class:

$$\mathcal{H} = \left\{ \bigcup_{i \in [p]} \{x_i^1, \dots, x_i^{\ell_i}\} : (\ell_1, \dots, \ell_p) \in [\ell]^p \right\} \quad (23)$$

Let  $\mathcal{C} = \{C_1, C_2\}$  be any partition of  $X$  with  $C_1 \in \mathcal{H}$  and  $C_2 = X \setminus C_1$ . First, we observe that  $C_1$  and  $C_2$  are separated by a hyperplane. Let  $(\ell_1, \dots, \ell_p)$  be the vector defining  $C_1$ . Then we let:

$$u = (-\ell_1, \dots, -\ell_p, 1) \quad (24)$$

Then for any  $x_i^j \in X$ ,

$$\langle u, x_i^j \rangle = -\ell_i + j \quad (25)$$

which is bounded from above by zero if and only if  $j \leq \ell_i$ , that is, if and only if  $x_i^j \in C_1$ . Hence  $C_1$  and  $C_2$  admit a linear separator. Next we prove that, under the Euclidean distance,  $C_1$  and  $C_2$  have strong convex hull margin  $\gamma$ . Using the vector  $u$  defined above, since every  $x_i^j \in C_2$  has  $j \geq \ell_i + 1$ , then  $\langle u, x_i^j \rangle \geq 1$ . This implies:

$$d(\text{conv}(C_1), \text{conv}(C_2)) \geq \frac{1}{\|u\|_2} \geq \frac{1}{\sqrt{p\ell^2 + 1}} \geq \frac{1}{\ell\sqrt{m}} \quad (26)$$

The diameter of  $C_1$  is at most that of  $X$ , which equals  $d(x_1^1, x_2^\ell) \leq \ell - 1 + \sqrt{2} \leq 2\ell$ . Together with (26) and the fact that  $\ell \leq \frac{1}{\sqrt{2\gamma\sqrt{m}}}$ , this provides:

$$d(\text{conv}(C_1), \text{conv}(C_2)) \geq \frac{1}{2\ell^2\sqrt{m}} \phi_d(C_1) \geq \frac{2\gamma\sqrt{m}}{2\sqrt{m}} \phi_d(C_1) = \gamma \phi_d(C_1) \quad (27)$$

The same holds for  $C_2$ . Hence  $\mathcal{C}$  has strong convex hull margin  $\gamma$ .

**Query bound.** Let  $V_0 = \{(C_1, C_2) : C_1 \in \mathcal{H}\}$ . This is the initial version space. We let the target concept  $\mathcal{C} = (C_1, C_2)$  be drawn uniformly at random from  $V_0$ . For all  $t = 0, 1, \dots$ , we denote by  $V_t$  be the version space after the first  $t$  SEED queries made by the algorithm. Now fix any  $t \geq 1$  and let  $\text{SEED}(U, y)$  be the  $t$ -th such query. Without loss of generality we assume  $y = 1$ ; a symmetric argument applies to  $y = 2$ . If  $U \cap C_1$  contains a point  $x$  in the agreement region of  $V_{t-1}$ , i.e., whose label can be inferred from past queries, then we return  $x$ . Therefore we can continue under the assumption that  $U$  does not contain any such point (doing otherwise cannot reduce the probability that the algorithm learns nothing). The oracle answers so to maximize  $\frac{|V_t|}{|V_{t-1}|}$ , as described below.

For each  $i \in [p]$  let  $S_i = \{x_i^j : j \in [\ell]\}$ . We consider  $S_i$  as a sequence of points sorted by the index  $j$ . Let  $Z_i$  be the subset of  $S_i$  in the disagreement region of  $V_{t-1}$  together with the point in  $S_i$  preceding this region; observe that this point always exists, as  $x_i^1 \in C_1$  is in the agreement region. Note that  $Z_i$  is necessarily an interval of  $S_i$ . We let  $U_i = Z_i \cap U$  for each  $i \in [p]$  and  $P(U) = \{i \in [p] : U_i \neq \emptyset\}$ . For every  $i \in P(U)$ , we let  $\alpha_i$  be the fraction of points of  $Z_i$  that precede the first point in  $U_i$ . Let  $x_i^* = \arg \max\{j : x_i^j \in S_i \cap C_1\}$ . Observe that  $|V_{t-1}| = \prod_{i \in [p]} |Z_i|$ , as  $x_i^*$  can be every point of  $Z_i$ . Indeed,  $x_i^*$  is uniformly distributed over  $Z_i$ ; either  $x_i^*$  is a point in the disagreement region of  $S_i$ , or the disagreement region of  $S_i$  is fully contained in  $C_2$  and  $x_i^*$  is the point preceding the disagreement region of  $S_i$ .

Now we show that  $\mathbb{E}[|V_{t-1}|/|V_t|] \leq p + 1$ . Let  $\mathcal{E}$  be the event that  $\text{SEED}(U, 1) = \text{NIL}$ . Write:

$$\mathbb{E} \left[ \frac{|V_{t-1}|}{|V_t|} \right] = \Pr(\mathcal{E}) \mathbb{E} \left[ \frac{|V_{t-1}|}{|V_t|} \mid \mathcal{E} \right] + \Pr(\bar{\mathcal{E}}) \mathbb{E} \left[ \frac{|V_{t-1}|}{|V_t|} \mid \bar{\mathcal{E}} \right] \quad (28)$$

We bound the two terms of (28) starting with the first one. Note that  $\mathcal{E}$  holds if and only if  $U_i \cap C_1 = \emptyset$  for all  $i \in P(U)$ . Since  $x_i^*$  is uniformly distributed over  $Z_i$ , for all  $i \in P(U)$  we have:

$$\Pr(C_1 \cap U_i = \emptyset) = \alpha_i \quad (29)$$

And since the distributions of those points are independent:

$$\Pr(\mathcal{E}) = \prod_{i \in P(U)} \Pr(C_1 \cap U_i = \emptyset) = \prod_{i \in P(U)} \alpha_i \quad (30)$$

If  $\Pr(\mathcal{E}) > 0$  and  $\mathcal{E}$  holds, then  $x_i^*$  is uniformly distributed over the first  $\alpha_i |Z_i|$  points of  $Z_i$ , as the rest of  $Z_i$  belongs to  $C_2$ . This holds independently for all  $i$ , thus:

$$|V_t| = \left( \prod_{i \in P(U)} \alpha_i |Z_i| \right) \left( \prod_{i \in [p] \setminus P(U)} |Z_i| \right) = \left( \prod_{i \in P(U)} \alpha_i \right) \left( \prod_{i \in [p]} |Z_i| \right) = |V_{t-1}| \prod_{i \in P(U)} \alpha_i \quad (31)$$

It follows that  $\Pr(\mathcal{E}) \mathbb{E} \left[ \frac{|V_{t-1}|}{|V_t|} \mid \mathcal{E} \right] \leq 1$ .

Let us now bound the second term of (28). If  $\mathcal{E}$  does not hold, then  $\text{SEED}(U, 1)$  returns the smallest point  $x \in U_i$  for any  $i \in P(U)$  such that  $C_1 \cap U_i \neq \emptyset$  (note that necessarily  $x \in C_1$ ). For any fixed  $i \in P(U)$ , the probability of returning the smallest point of  $U_i$  is bounded by  $\Pr(C_1 \cap U_i \neq \emptyset)$ , which is  $1 - \alpha_i$ ; and if this is the case, then we have  $|V_t| = (1 - \alpha_i) |V_{t-1}|$ . Thus:

$$\Pr(\bar{\mathcal{E}}) \mathbb{E} \left[ \frac{|V_{t-1}|}{|V_t|} \mid \bar{\mathcal{E}} \right] \leq \Pr(\bar{\mathcal{E}}) \max_{i \in P(U)} (1 - \alpha_i) \frac{1}{(1 - \alpha_i)} = \Pr(\bar{\mathcal{E}}) \leq 1 \quad (32)$$

So the two terms of (2) are both bounded by 1; we conclude that  $\mathbb{E} \left[ \frac{|V_{t-1}|}{|V_t|} \right] \leq 2$ .

We can conclude the query bound. For any  $\bar{t} \geq 1$ ,

$$\mathbb{E} \left[ \log \frac{|V_0|}{|V_{\bar{t}}|} \right] = \mathbb{E} \left[ \sum_{t=1}^{\bar{t}} \log \frac{|V_{t-1}|}{|V_t|} \right] \quad (33)$$

$$= \sum_{t=1}^{\bar{t}} \mathbb{E} \left[ \log \frac{|V_{t-1}|}{|V_t|} \right] \quad (34)$$

$$\leq \sum_{t=1}^{\bar{t}} \log \mathbb{E} \left[ \frac{|V_{t-1}|}{|V_t|} \right] \quad \text{Jensen's inequality} \quad (35)$$

$$\leq \sum_{t=1}^{\bar{t}} \log 2 \quad \text{see above} \quad (36)$$

$$= \bar{t} \quad (37)$$

Since  $|V_0| = \ell^{m-1}$ , by Markov's inequality, and since  $(m-1) \log \ell - \log 2 \geq \frac{(m-1) \log \ell}{2} \geq \frac{m \log \ell}{4}$ :

$$\Pr(|V_{\bar{t}}| \leq 2) = \Pr \left( \log \frac{|V_0|}{|V_{\bar{t}}|} \geq (m-1) \log \ell - \log 2 \right) \leq \frac{4 \mathbb{E} \left[ \log \frac{|V_0|}{|V_{\bar{t}}|} \right]}{m \log \ell} \leq \frac{4 \bar{t}}{m \log \ell} \quad (38)$$

Now let  $T$  be the random variable counting the number of queries spent by the algorithm, and let  $V_T$  be the version space at return time. Since  $\mathcal{C}$  is uniform over  $V_T$  and  $\mathcal{C}$  is returned with probability at least  $\frac{1}{2}$ , then  $\Pr(|V_T| \leq 2) \geq \frac{1}{2}$ . By (38) and linearity of expectation,

$$\frac{1}{2} \leq \Pr(|V_T| \leq 2) = \sum_{\bar{t} \geq 0} \Pr(T = \bar{t}) \Pr(|V_{\bar{t}}| \leq 2) \leq \sum_{\bar{t} \geq 0} \Pr(T = \bar{t}) \cdot \frac{4 \bar{t}}{m \log \ell} = \mathbb{E}[T] \frac{4}{m \log \ell} \quad (39)$$

Therefore  $\mathbb{E}[T] \geq \frac{m \log \ell}{8}$ . Now, since  $\ell \geq 4$  then  $\ell \geq \frac{4}{5\sqrt{2\gamma\sqrt{m}}}$ , which since  $m \leq (16\gamma)^{-2/3}$  yields

$$\ell \geq \frac{4}{5\sqrt{2\gamma(16\gamma)^{-1/3}}} = \sqrt[3]{\frac{1}{\gamma}} \frac{4}{5\sqrt{2(16)^{-1/3}}} = \sqrt[3]{\frac{1}{\gamma}} \frac{4 \cdot 4^{1/3}}{5\sqrt{2}} \quad (40)$$

Since  $\frac{4^{4/3}}{5\sqrt{2}} > 0.89$ , we conclude that:

$$\mathbb{E}[T] > \frac{m \log \frac{0.89}{\sqrt[3]{\gamma}}}{8 \log m} > \frac{m \frac{1}{3} \log \frac{1}{2\gamma}}{8 \log m} = \frac{m \log \frac{1}{2\gamma}}{24 \log m} \quad (41)$$

which concludes the proof for  $k = 2$ .

**Multiclass.** For any  $k \geq 2$  let  $k' = \lfloor \frac{k}{2} \rfloor$ . For each  $s \in [k']$  consider the construction for the case  $k = 2$  shifted along the  $m$ -th dimension by  $(s-1)\ell \cdot e_m$ :

$$X_s = \left\{ x_i^j + (s-1)\ell \cdot e_m : i \in [p], j \in [\ell] \right\} \quad (42)$$

We let  $X^* = \bigcup_{s \in [k']} X_s$ , and we define the possible subsets of  $X^*$  corresponding to class  $C_{2s-1}$  as:

$$\mathcal{H}_s = \left\{ \bigcup_{i \in [p]} \left\{ x_i^1 + (s-1)\ell \cdot e_m, \dots, x_i^{\ell_i} + (s-1)\ell \cdot e_m \right\} : (\ell_1, \dots, \ell_p) \in [\ell]^p \right\} \quad (43)$$

Finally, let  $\mathcal{H}$  be the set of all partitions  $\mathcal{C} = (C_1, \dots, C_k)$  of  $X^*$  such that  $C_{2s-1} \in \mathcal{H}_s$  and  $C_{2s} = X_s \setminus C_{2s-1}$  for all  $s \in [k']$ , and let  $C_k = \emptyset$  in case  $k$  is odd. The same arguments of the case  $k = 2$  prove that any such  $\mathcal{C}$  has convex hull margin  $\gamma$ . Indeed, for adjacent classes  $C_i, C_{i+1}$  those arguments prove that the strong convex hull margin is at least  $\gamma$ ; for non-adjacent classes, the margin can only be larger. The random target concept  $\mathcal{C} = (C_1, \dots, C_k)$  is obtained by drawing each  $C_{2s-1}$  for  $s \in [k']$  uniformly at random from  $\mathcal{H}_s$ , and letting  $C_{2s} = X_s \setminus C_{2s-1}$ .

We turn to the bound. Consider a generic query  $\text{SEED}(U, i)$  issued by the algorithm. Without loss of generality we can assume  $U \subseteq C_{2s-1} \cup C_{2s} = X_s$  where  $s = \lfloor \frac{i}{2} \rfloor$ ; indeed, by construction of  $\mathcal{H}$ , that query can never return a point in  $U \setminus X_s$ . This shows that learning  $\mathcal{C}$  requires solving the  $k'$  independent binary instances  $X_s$ , returning  $C_s = (C_{2s-1}, C_{2s})$ , for  $s \in [k']$ . As the probability of returning  $\mathcal{C}$  is bounded from above by the minimum over  $s \in [k]$  of the probability of returning  $C_s$ , the algorithm must make at least  $\frac{m}{24} \log \frac{1}{2\gamma}$  queries for each  $s \in [k']$ , concluding the proof.

## C Supplementary material for Section A.4

**Lemma 13.** *Let  $C \subseteq X$  have strong convex hull margin  $\gamma \in (0, 1]$  w.r.t.  $d$ . For any  $x_1 \in C$   $\text{BallSearch}(X, x_1)$  takes time  $\text{poly}(n + m)$ , uses  $\mathcal{O}(\log n)$  LABEL queries and  $\mathcal{O}(\log \frac{\kappa_d}{\gamma})$  SEED queries, and outputs  $\hat{X} \subseteq X$  such that*

1.  $C \subseteq \hat{X}$
2.  $d_{\text{euc}}(\text{conv}(C), \text{conv}(\hat{X} \setminus C)) \geq \frac{\gamma^2}{4\kappa_d^2} \phi(\hat{X})$

*Proof.* To begin, observe that  $d_{\text{euc}} \leq d \leq \kappa_d d_{\text{euc}}$  implies that the ratio between distances changes by a factor at most  $\kappa_d$  between  $d_{\text{euc}}$  and  $d$ . In particular this implies that for any set  $\hat{X} \subseteq X$ :

$$\frac{d_{\text{euc}}(\text{conv}(C), \text{conv}(\hat{X} \setminus C))}{\phi(C)} \geq \frac{d(\text{conv}(C), \text{conv}(\hat{X} \setminus C))}{\kappa_d \phi_d(C)} \quad (44)$$

We will use this inequality below.

Now, suppose line 5 of  $\text{BallSearch}$  returns, so  $\hat{X} = X$ . The running time, the query bounds, and point (1) are straightforward. To prove (2), since  $x_1, x_n \in C$  we have:

$$\phi(C) \geq d_{\text{euc}}(x_1, x_n) \geq \frac{1}{2} \phi(X) = \frac{1}{2} \phi(\hat{X}) \geq \frac{\gamma}{2\kappa_d} \phi(\hat{X}) \quad (45)$$

where we used  $\phi(X) = \max_{a,b \in X} d_{\text{euc}}(a, b) \leq \max_{a,b \in X} (d_{\text{euc}}(a, x_1) + d_{\text{euc}}(x_1, b)) \leq 2d_{\text{euc}}(x_1, x_n)$ . Therefore  $\phi(\hat{X}) \leq \frac{2\kappa_d}{\gamma} \phi(C)$ , which together with (44) and the margin condition gives:

$$\frac{d(\text{conv}(C), \text{conv}(\hat{X} \setminus C))}{\phi(\hat{X})} \geq \frac{d_{\text{euc}}(\text{conv}(C), \text{conv}(\hat{X} \setminus C))}{\frac{2\kappa_d}{\gamma} \phi(C)} \geq \frac{d(\text{conv}(C), \text{conv}(\hat{X} \setminus C))}{\frac{2\kappa_d}{\gamma} \kappa_d \phi_d(C)} \geq \frac{\gamma^2}{2\kappa_d^2} \quad (46)$$

We turn to the **repeat** loop. Consider a generic iteration just before the update of  $t$ . We prove:

- (a)  $d(C, \hat{X} \setminus C) \geq \min\left(t, \frac{\gamma}{\kappa_d}\right) \frac{\gamma}{2\kappa_d} \phi(\hat{X})$
- (b) if  $t \leq \frac{\gamma}{\kappa_d}$  then  $C \subseteq \hat{X}$

First, suppose  $\text{SEED}(U_i, +1) = \text{NIL}$ , in which case  $\hat{X} = X \cap B(x_1, r)$ . To prove (a), observe that  $x_1, x_{\text{lo}} \in C$  implies:

$$\phi(C) \geq d_{\text{euc}}(x_1, x_{\text{lo}}) = r \geq \frac{1}{2} \phi(\hat{X}) \geq \min\left(\frac{t}{2}, \frac{\gamma}{2\kappa_d}\right) \phi(\hat{X}) \quad (47)$$

Now use the argument above, but with  $1/\min\left(\frac{t}{2}, \frac{\gamma}{2\kappa_d}\right)$  in place of  $\frac{2\kappa_d}{\gamma}$  in (46). To prove (b), note that  $x_1 \in C$  and  $x_{\text{hi}} \in X \setminus C$  implies  $R = d_{\text{euc}}(x_1, x_{\text{hi}}) \geq d_{\text{euc}}(C, X \setminus C)$ . Since  $d_{\text{euc}} \leq d \leq \kappa_d d_{\text{euc}}$ , and by the margin assumptions,

$$\frac{R}{\phi(C)} \geq \frac{d_{\text{euc}}(C, X \setminus C)}{\phi(C)} \geq \frac{d(C, X \setminus C)}{\kappa_d \phi_d(C)} \geq \frac{\gamma}{\kappa_d} \geq \min\left(t, \frac{\gamma}{\kappa_d}\right) \quad (48)$$

Therefore  $\phi(C) \leq \max(\frac{1}{t}, \frac{\kappa_d}{\gamma})R$ , which implies  $C \subseteq X \cap B(x_1, \max(\frac{1}{t}, \frac{\kappa_d}{\gamma})R)$ . For  $t \leq \frac{\kappa_d}{\gamma}$  the right-hand side is  $X \cap B(x_1, \frac{1}{t}R)$ . Note however that  $X \cap B(x_1, \frac{1}{t}R) = (X \cap B(x_1, r)) \cup U_i$  since  $x_{\text{lo}}, x_{\text{hi}}$  are adjacent in the sorted list. But  $\text{SEED}(U_i, +1) = \text{NIL}$ , hence  $C \subseteq X \cap B(x_1, r) = \hat{X}$ .

Next, suppose  $\text{SEED}(U_i, +1) = y \neq \text{NIL}$ , in which case  $\hat{X} = X \cap B(x_1, \frac{1}{t}R)$ . To prove (a), note that  $\phi(C) \geq d(x_1, y) \geq R$ , and that  $\phi(\hat{X}) \leq 2\frac{1}{t}R$ . Hence  $\phi(C) \geq \frac{t}{2}\phi(\hat{X}) \geq \min(\frac{t}{2}, \frac{\gamma}{2\kappa_d})\phi(\hat{X})$ . Now use again the argument above, but with  $1/\min(\frac{t}{2}, \frac{\gamma}{2\kappa_d})$  in place of  $\frac{2\kappa_d}{\gamma}$  in (46). To prove (b), the argument for the case above implies  $C \subseteq X \cap B(x_1, \max(\frac{1}{t}, \frac{\kappa_d}{\gamma})R)$ . If  $t \leq \frac{\gamma}{\kappa_d}$  then the right-hand side is just  $\hat{X}$ .

To conclude the proof, note that by point (b) above the **repeat** loop returns in  $\mathcal{O}(\log \frac{\kappa_d}{\gamma})$  iterations. Therefore  $\text{BallSearch}(X, x_1)$  uses  $\mathcal{O}(\log n)$  LABEL queries and  $\mathcal{O}(\log \frac{\kappa_d}{\gamma})$  SEED queries. Finally, note that the running time can be brought to  $\text{poly}(n + m)$  by storing the output of all SEED queries, and replacing  $U_i$  with  $U_i \setminus U_i \cap \hat{C}$  where  $\hat{C} \subset C$  is the subset of points of  $C$  known so far. In this way, at each **repeat** iteration either  $\hat{X}_i \subseteq C$  or we learn the label of some point of  $C$  previously unknown. Therefore **repeat** makes at most  $n$  iterations; it is immediate to see that each iteration takes time  $\text{poly}(n + m)$  and thus  $\text{BallSearch}$  runs in time  $\text{poly}(n + m)$  as well.  $\square$

### C.1 Proof of Theorem 3

Let  $x = \text{SEED}(X, +1)$ . If  $x = \text{NIL}$  then stop and return  $\emptyset$ . Otherwise run  $\text{BallSearch}(X, x)$  to obtain  $\hat{X}$ . By Lemma 13 this takes  $\text{poly}(n + m)$  time,  $\mathcal{O}(\log n)$  LABEL queries, and  $\mathcal{O}(\log \frac{\kappa_d}{\gamma})$  SEED queries. By Lemma 13  $C \subseteq \hat{X}$ , and  $C$  and  $\hat{X} \setminus C$  are linearly separated with margin  $\frac{\gamma^2}{4\kappa_d^2}\phi(\hat{X})$ . Thus  $\hat{X}$  satisfies the assumptions of Theorem 10 with  $R/r = \frac{4\kappa_d^2}{\gamma^2}$ , and by running  $\text{CPLearn}(\hat{X})$  we obtain  $C$  in time  $\text{poly}(n + m)$  using  $\mathcal{O}(m \log \frac{\kappa_d}{\gamma})$  SEED queries in expectation.

## D Bounds for inputs with bounded bit complexity

We consider the case where  $X$  has bounded bit complexity, distinguishing two widely used cases.

### D.1 Rational coordinates

Suppose  $X \subset \mathbb{Q}^m$  and every  $x \in X$  can be encoded in  $b(x) \leq B$  bits as follows [Korte and Vygen, 2018]. If  $x \in \mathbb{Z}$ , then  $b(x) = 1 + \lceil \log(|x| + 1) \rceil$ . If  $x = p/q \in \mathbb{Q}$  with  $p, q \in \mathbb{Z}$  coprime, then  $b(x) = b(p) + b(q)$ . If  $x \in \mathbb{Q}^m$ , then  $b(x) = m + \sum_{i \in [m]} b(x_i)$ . We show that  $B$  gives a lower bound on the margin. The argument is related to Kwek and Pitt [1998].

**Lemma 14.** *Suppose  $X \subset \mathbb{Q}^m$  has bit complexity bounded by  $B$ , and suppose  $C \subseteq X$  and  $X \setminus C$  are linearly separable. Then  $d(\text{conv}(C), \text{conv}(X \setminus C)) \geq 2^{-\mathcal{O}(m^2 B)}$ .*

*Proof.* Let  $P = \text{conv}(C)$  and let  $H$  be a hyperplane containing a face of  $P$ . By Lemma 4.5 of Korte and Vygen [2018],  $H = \{x \in \mathbb{R}^m : \langle w, x \rangle = t\}$  for some  $w \in \mathbb{Q}^m$  and  $t \in \mathbb{Q}$  such that  $b(w) + b(t) \leq 75m^2 B$ . The distance between  $H$  and any  $x \in X \setminus C$  is:

$$d(x, H) = \frac{|\langle w, x \rangle - t|}{\|w\|_2} \quad (49)$$

To bound  $|\langle w, x \rangle - t|$  suppose  $w, x, t$  are encoded by:

$$w_i = \frac{p_w^i}{q_w^i} \quad i \in [m], \quad x_i = \frac{p_x^i}{q_x^i} \quad i \in [m], \quad t = \frac{p_t}{q_t} \quad (50)$$

Replacing those quantities in the expression of  $|\langle w, x \rangle - t|$ , taking the common denominator, observing that the numerator of the resulting expression is an integer, and recalling that  $|\langle w, x \rangle - t| > 0$ , we deduce:

$$|\langle w, x \rangle - t| \geq \frac{1}{q_t \prod_{i \in [m]} q_w^i q_x^i} \quad (51)$$

However, since  $b(x) = \mathcal{O}(\log(1 + |x|))$  for any  $x \in \mathbb{Z}$ ,

$$b\left(q_t \prod_{i \in [m]} q_w^i q_x^i\right) = \mathcal{O}\left(b(q_t) + \sum_{i \in [m]} (b(w_i) + b(x_i))\right) = \mathcal{O}(b(t) + b(w) + b(x)) \quad (52)$$

which therefore is in  $\mathcal{O}(m^2 B)$ . Therefore  $|\langle w, x \rangle - t| \geq 2^{-\mathcal{O}(m^2 B)}$ . To bound  $\|w\|_2$  we just note that  $\|w\|_2 \leq \|w\|_1 \leq 2^{b(w)} \leq 2^{75m^2 B}$ . We conclude that:

$$d(x, H) = \frac{|\langle w, x \rangle - t|}{\|w\|_2} \geq 2^{-\mathcal{O}(m^2 B)} \quad (53)$$

The proof is complete.  $\square$

**Corollary 15.** *Suppose  $X \subset \mathbb{N}^m$  has bit complexity bounded by  $B \in \mathbb{N}$  in the rational coordinates model, and let  $\mathcal{C} = (C_1, \dots, C_k)$  be a partition of  $X$  such that  $C_i, C_j$  are linearly separable for every distinct  $i, j \in [k]$ . Then  $\mathcal{C}$  can be learned in time  $\text{poly}(n + m)$  using  $\mathcal{O}(k^2 m^3 B)$  SEED queries in expectation.*

*Proof.* Any  $x \in X$  satisfies  $\|x\|_2 \leq \|x\|_1 \leq 2^B$ , and by Lemma 14 any two distinct classes  $C_i, C_j \in \mathcal{C}$  are linearly separable with margin  $r = 2^{-\mathcal{O}(m^2 B)}$ . By Theorem 10,  $\text{CPLearn}(X)$  with SEED restricted to classes  $i, j$  returns a separator for  $C_i$  and  $C_j$  in time  $\text{poly}(m + n)$  using  $\mathcal{O}(m \log \frac{R}{r}) = \mathcal{O}(m^3 B)$  SEED queries in expectation. By intersecting the separators for all  $j \in [k] \setminus i$  we obtain  $C_i$ . Repeating this process for all  $i \in [k]$  yields the claim.  $\square$

## D.2 Grid

Let  $c > 0$  be such that  $1/c$  is an integer and suppose that  $X \subseteq Q = \{-1, -1 + c, \dots, 1 - c, 1\}^m$ . We call this the grid model. If  $1/c \leq 2^{B/m} - 1$  then we say that the bit complexity of  $X$  is bounded by  $B$ .

**Corollary 16.** *Suppose  $X \subset \mathbb{N}^m$  has bit complexity bounded by  $B \in \mathbb{N}$  in the grid model, and let  $\mathcal{C} = (C_1, \dots, C_k)$  be a partition of  $X$  such that  $C_i, C_j$  are linearly separable for every distinct  $i, j \in [k]$ . Then  $\mathcal{C}$  can be learned in time  $\text{poly}(n + m)$  using  $\mathcal{O}(k^2 m(B + \log m))$  SEED queries in expectation.*

*Proof.* We use the approach of Gonen et al. [2013]. Let  $c > 0$  be such that  $1/c$  is an integer and suppose that  $X \subseteq Q = \{-1, -1 + c, \dots, 1 - c, 1\}^m$ . By Lemma 10 of Gonen et al. [2013], any two sets in  $Q$  that are linearly separable are also linearly separable with margin  $r = (c/\sqrt{m})^{m+2}$ . We can thus apply  $\text{CPLearn}$  as in the proof of Corollary 15, obtaining for separating every  $C_i, C_j$  a running time of  $\text{poly}(m + n)$  and an expected query bound of  $\mathcal{O}(m \log \frac{R}{r}) = \mathcal{O}(m^2 \log(m/c))$ . Since  $c \geq 2^{-B/m} - 1$ , then the bound becomes  $\mathcal{O}(m^2 \log(m 2^{B/m})) = \mathcal{O}(m^2 (B/m + \log m)) = \mathcal{O}(m(B + \log m))$ . This proves the total expected query bound of  $\mathcal{O}(k^2 m(B + \log m))$ .  $\square$
